# Supplementary material
Source: PubMed Central journal article supplement (PMC4761466)
Supplement: NIHMS750458-supplement-1.pdf [file NIHMS750458-supplement-1.pdf]

# SUPPLEMENTARY FIGURE 1

A

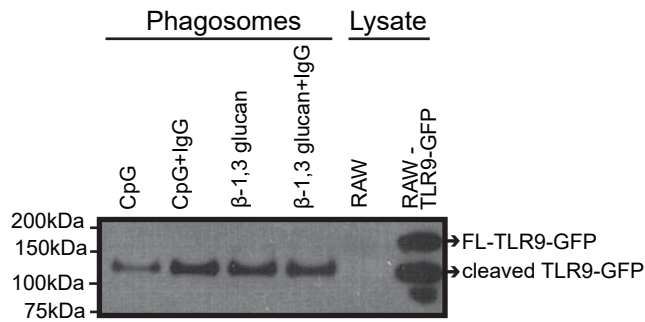

B

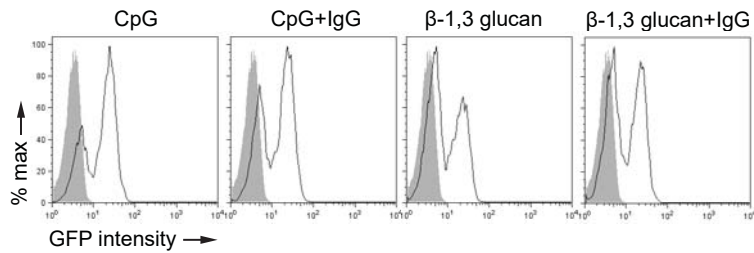

C

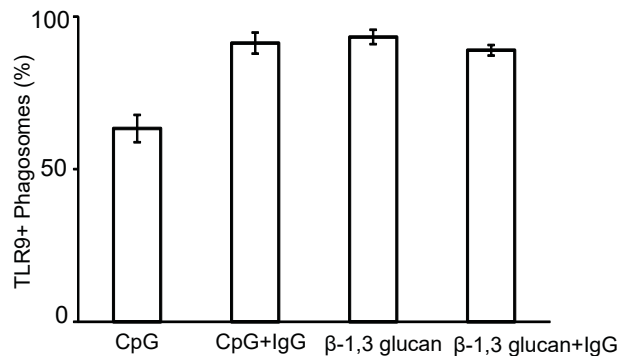

**Supplemental Figure 1.** TLR9 recruitment is not enhanced by the addition of anti- $\beta$ -1,3 glucan antibody to  $\beta$ -1,3 glucan beads. **(A-C)** RAW TLR9-GFP incubated with CpG, CpG+IgG,  $\beta$ -1,3 glucan, or  $\beta$ -1,3 glucan+IgG beads for 2 h. **(A)**  $1 \times 10^6$  purified phagosomes were resolved by SDS-PAGE and blotted for TLR9-GFP. Lysate controls indicate full-length (FL) TLR9-GFP and cleaved TLR9-GFP. **(B)** Indicated purified phagosomes were analyzed by phagoFACS for TLR9-GFP recruitment (black line) and compared to bead-only control (gray shaded histogram). **(C)** RAW TLR9-GFP cells are treated as described in (A). The percentage of positive TLR9-GFP phagosomes was assessed by confocal microscopy ( $n \geq 75$ ). Results are representative of five (A and B) or three (C) independent experiments.

## SUPPLEMENTARY FIGURE 2

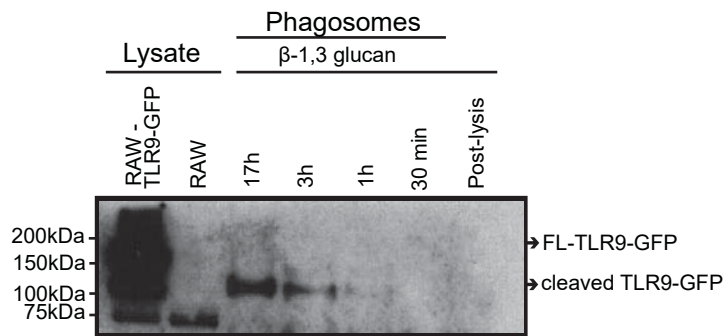

**Supplemental Figure 2.** Cleaved portion of TLR9 is recruited to β-1,3 glucan phagosomes. RAW macrophages expressing TLR9-GFP were stimulated with β-1,3 glucan beads for 30 min, 1 h, 3 h and 17 h and addition of β-1,3 glucan beads to cell lysate indicated as post-lysis. TLR9-GFP recruitment to purified phagosomes containing β-1,3 glucan beads were analyzed by immunoblot. Lysate control of indicated cell type were used to indicate FL-TLR9-GFP and cleaved TLR9-GFP. Data are representative of three independent experiments.

## SUPPLEMENTARY FIGURE 3

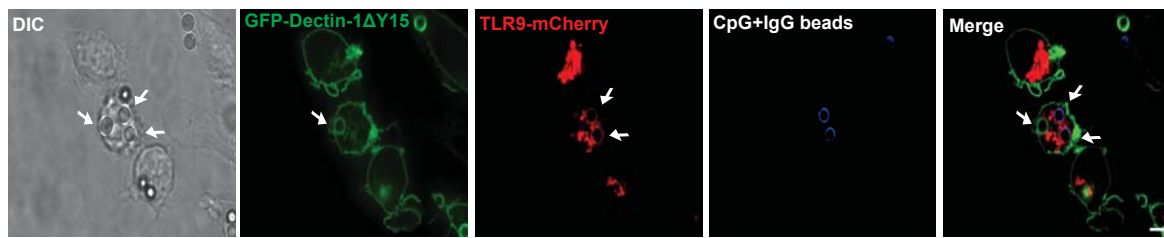

**Supplemental Figure 3.** Dectin-1 dependent Syk activation requirement for TLR9 recruitment to  $\beta$ -1,3 glucan beads is maintained in the presence of CpG-IgG beads. Confocal microscopy of Dectin-1-knockout macrophages expressing TLR9-mCherry and GFP-Dectin-1 $\Delta$ Y15 co-incubated with  $\beta$ -1,3 glucan and CpG-IgG beads for 3 h. Original magnification X100. Scale bar indicates 5 $\mu$ m. Data are representative of three independent experiments.
